# Supplementary material
Source: Springer Nature journal article supplement (https://www.springermedizin.de/resource/supplementary/12974_2011_464_MOESM3_ESM.pdf/9601326)

**FIGURE 3**

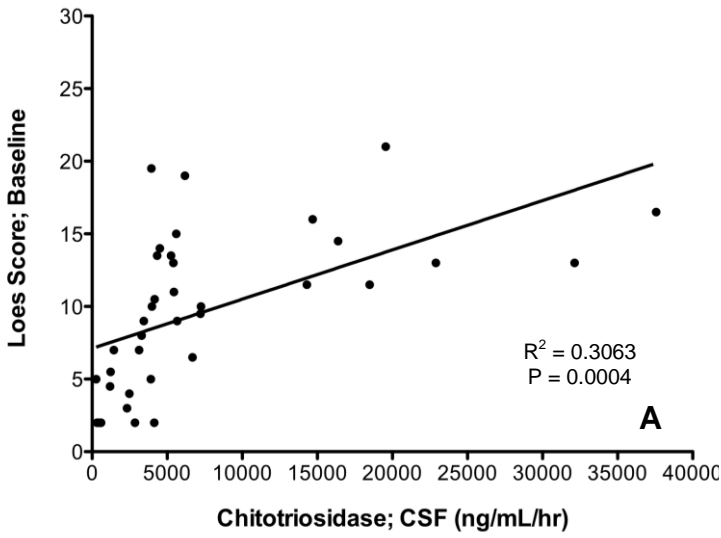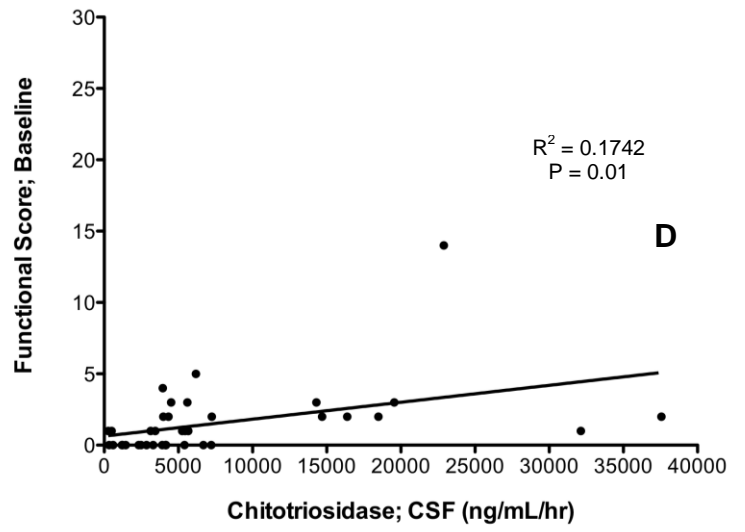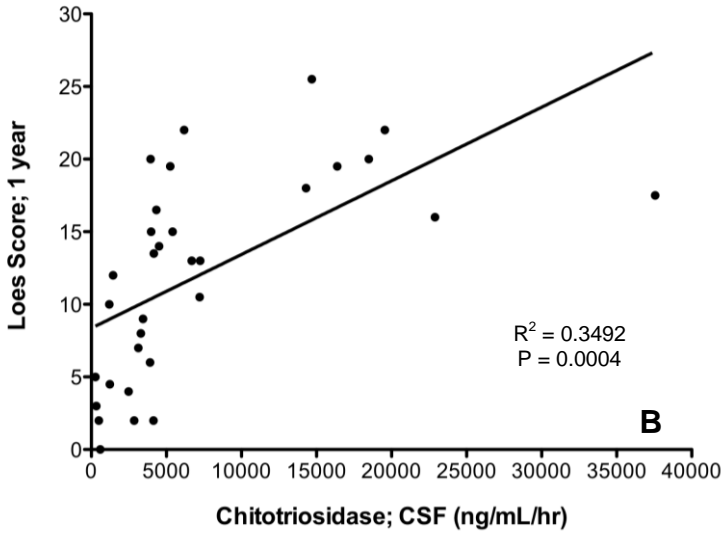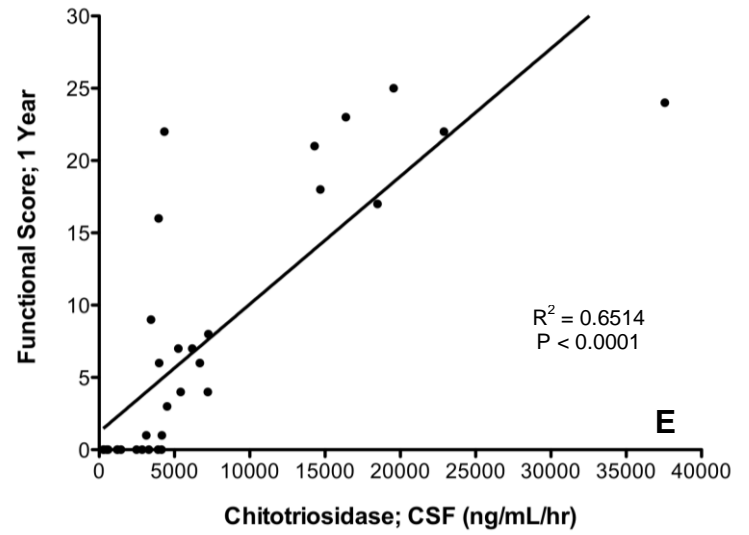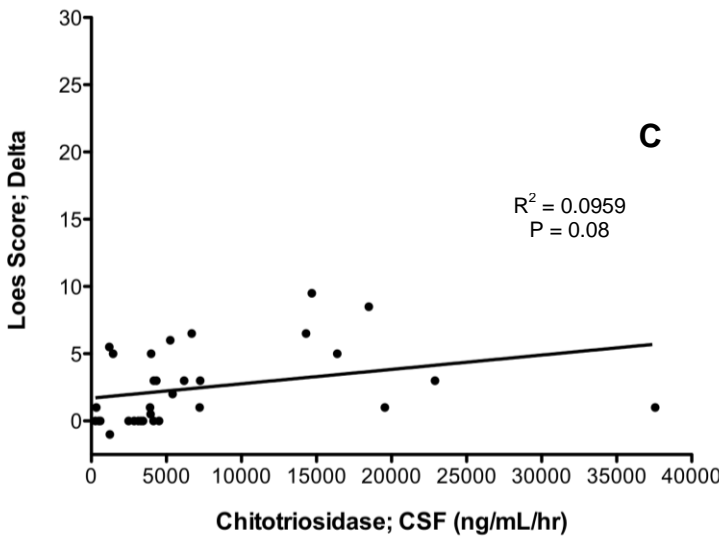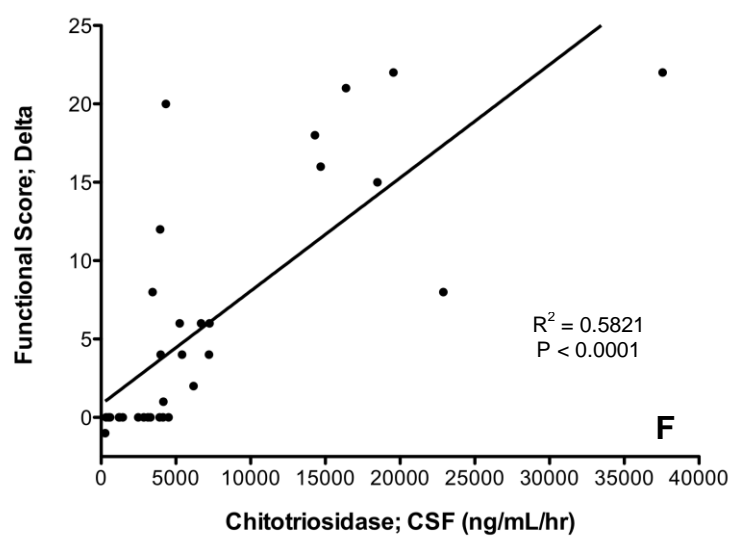

Supplement: MOESM3 [file 9601326]
